# Subject Index

## (ADP-ribose) transferase

activity and chondrocytic differentiation in chick limb bud cells: NAKANISHI & UYEKI 163

## Alphafetoprotein

synthesis in human foetal yolk sack and organs: SHI, HOPKINS, THOMPSON, HEATH, LUKE & GRAHAM 191

## Amphibia

newt

cell surface changes during cleavage of eggs: OHSIMA & KUBOTA 21

## Apolipoprotein

synthesis in human foetal yolk sack and organs: SHI, HOPKINS, THOMPSON, HEATH, LUKE & GRAHAM 191

## Autoradiography

of development of germ cells in polychaete: EMANUELSSON & ANEHUS 151

## Benzamide

effect on chondrocytic differentiation in chick limb bud cells: NAKANISHI & UYEKI 163

## Blastema

formation during regeneration and wound healing in cockroach leg: TRUBY 177

## Brain

human

synthesis of apolipoproteins and other proteins: SHI, HOPKINS, THOMPSON, HEATH, LUKE & GRAHAM 191

## Cell culture

of female germ cells of polychaete *Ophryotrocha*: EMANUELSSON & ANEHUS 151

## Cell death

during formation of free digits in avian limb bud: HURLE, COLVEE & FERNANDEZ-TERAN 239

## Cell lineage

of muscles of *Drosophila* head: RAGHAVAN & PINTO 285

## Cell numbers

during neurulation in rat: TUCKETT & MORRISS-KAY 111

## Cell surface

changes during cleavage of newt eggs: OHSIMA & KUBOTA 21

## Chick

embryo

effects of cytochalasin B on intestine in organ culture: NODA 47

protein synthetic patterns: LOVELL-BADGE, EVANS & BELLAIRS 65

role of ZPA in development of wing buds in wingless mutants: WILSON & HINCHLIFFE 271

vascular regression during formation of free digits in avian limb bud: HURLE, COLVEE & FERNANDEZ-TERAN 239

limb bud

effect of benzamide on chondrocytic differentiation: NAKANISHI & UYEKI 163

oviduct

growth stimulation by androgens: GRAU, REICHHART & THIEBOLD 81

wing bud

with dorsoventral or anteroposterior axis reversed – axon behaviour: STIRLING & SUMMERBELL 251

## Chimaeras

chick–quail

used to study behaviour of growing axons in chick wing buds: STIRLING & SUMMERBELL 251

mouse

clonal analysis of intestinal crypt populations: SCHMIDT, GARBUTT, WILKINSON & PONDER 121

## Chondrocytes

differentiation in chick limb bud cell culture: NAKANISHI & UYEKI 163

## Cleavage

cell surface changes in newt eggs: OHSIMA & KUBOTA 21

factors responsible for synchrony in *Xenopus* embryos: SHINAGAWA 33

## Clones

in intestinal crypt populations in mouse chimaeras: SCHMIDT, GARBUTT, WILKINSON & PONDER 121

## Cockroach (see *Periplaneta americana*)

## Cranial neuroepithelial cells

kinetic behaviour during neurulation in rat: TUCKETT & MORRISS-KAY 111

## Critical point

in moult cycle of cockroach for wound healing and regeneration: TRUBY 177

**Culture**

of chick embryonic intestine – effects of cytochalasin B: NODA 47

**Cyclic activities**

and synchronous cleavage in *Xenopus* embryos: SHINAGAWA 33

***Cynopus (Triturus) pyrrhogaster***

cell surface changes during cleavage of eggs: OHSHIMA & KUBOTA 21

**Cytochalasin B**

effects on previllous ridges in chick embryonic intestine: NODA 47

**Cytoplasmic cycle**

and synchronous cleavage in *Xenopus* embryos: SHINAGAWA 33

**Digit**

formation in avian limb bud: HURLE, COLVEE & FERNANDEZ-TERAN 239

***Dolichos biflorus* agglutinin**

as marker in chimaeric intestinal crypt populations: SCHMIDT, GARBUTT, WILKINSON & PONDER 121

***Drosophila melanogaster***

cell lineage of muscles of head: RAGHAVAN & PINTO 285

wing discs

pattern regulation in fragments which show variable wound healing: DALE & BOWNES 95

**Duck**

embryo

vascular regression during formation of free digits in avian limb bud: HURLE, COLVEE & FERNANDEZ-TERAN 241

**Ectoderm**

chick

protein synthetic patterns: LOVELL-BADGE, EVANS & BELLAIRS 65

**Electron microscopy**

of effects of cytochalasin B on chick embryonic intestine: NODA 47

**Endoderm**

chick

protein synthetic patterns: LOVELL-BADGE, EVANS & BELLAIRS 65

***engrailed* (*en*<sup>10</sup>)**

as cell lineage marker of muscles in head of *Drosophila*: RAGHAVAN & PINTO 285

**Eye**

translocation

in *Xenopus* – distribution of fibres in optic tract: TAYLOR, WILLSHAW & GAZE 225

**Fibre pathways**

in optic tract after contralateral eye translocation in *Xenopus*: TAYLOR, WILLSHAW & GAZE 225

**Germ cells**

in polychaete *Ophryotrocha*: EMANUELSSON & ANEHUS 151

**Growth stimulation**

of immature chick oviduct by androgens: GRAU, REICHHART & THIEBOLD 81

**Gut**

human

synthesis of apolipoproteins and other proteins: SHI, HOPKINS, THOMPSON, HEATH, LUKE & GRAHAM 191

**Human**

embryo

synthesis of apolipoproteins and other proteins by yolk sack: SHI, HOPKINS, THOMPSON, HEATH, LUKE & GRAHAM 191

**Imaginal discs**

pattern formation in fragments which show variable wound healing: DALE & BOWNES 95

**Innervation**

of chick wing bud with axes reversed: STIRLING & SUMMERBELL 251

**Insect**

leg regeneration and wound healing: TRUBY 177

**Intestine**

effects of cytochalasin B on previllous ridges in chick embryo: NODA 47

**Intestinal crypts**

in mouse aggregation chimaeras: SCHMIDT, GARBUTT, WILKINSON & PONDER 121

**Leg regeneration**

and wound healing in the cockroach: TRUBY 177

**Limb bud**

chick

effect of benzamide on chondrocytic differentiation: NAKANISHI & UYEKI 163

**Limb development**

comparative study of chick and duck embryos: HURLE, COLVEE & FERNANDEZ-TERAN 239

role of ZPA in development of wing buds in wingless mutant chicks: WILSON & HINCHLIFFE 271

- Liver**  
 human  
 synthesis of apolipoproteins and other proteins: SHI, HOPKINS, THOMPSON, HEATH, LUKE & GRAHAM 191
- Locust**  
 sensory neurons  
 development of projections and connections from transplantations: ANDERSON 207
- Microvillous-like processes**  
 in chick embryonic intestine cultures: NODA 47
- Mitosis**  
 in cranial neural epithelium of rat: TUCKETT & MORRISS-KAY 111
- Motor axons**  
 in chick wing buds with axes reversed: STIRLING & SUMMERBELL 251
- Mouse**  
 chimaera  
 clonal analysis of intestinal crypt populations: SCHMIDT, GARBUTT, WILKINSON & PONDER 121  
 embryo  
 effects of some Robertsonian chromosome combinations: REDI, GARAGNA, HILSCHER & WINKING 1
- Muscles**  
 cell lineage in *Drosophila* head: RAGHAVAN & PINTO 285
- Mutant**  
 wingless (*ws*)  
 role of ZPA in development of wing buds in chick embryos: WILSON & HINCHLIFFE 271
- Mutation**  
*engrailed* (*en<sup>10</sup>*) in *Drosophila*: RAGHAVAN & PINTO 285
- Neural tube**  
 kinetic behaviour during neurulation in rat: TUCKETT & MORRISS-KAY 111
- Neuronal projections**  
 and connections from transplanted locust sensory neurons: ANDERSON 207
- Newt (see *Cynopus pyrrhogaster*)**
- Nicotinamide adenine dinucleotide (NAD)**  
 levels in chick limb bud cell culture in presence of benzamide: NAKANISHI & UYEKI 163
- Oogenesis**  
 in polychaete *Ophryotrocha*: EMANUELSSON & ANEHUS 151
- Ophryotrocha labronica***  
 development of germ cells *in vitro*: EMANUELSSON & ANEHUS 151
- Oviduct**  
 growth stimulation in immature chick by androgens: GRAU, REICHHART & THIEBOLD 81
- Pattern regulation**  
 in fragments of *Drosophila* wing discs: DALE & BOWNES 95
- Periplaneta americana***  
 leg regeneration and wound healing: TRUBY 177
- Polychaete (see *Ophryotrocha labronica*)**
- Polypeptides**  
 synthetic patterns in tissues of early chick embryos: LOVELL-BADGE, EVANS & BELLAIRS 65
- Previllous ridges**  
 effects of cytochalasin B in chick embryonic intestine: NODA 47
- Proliferation**  
 in intestinal crypts in mouse chimaeras: SCHMIDT, GARBUTT, WILKINSON & PONDER 121  
 of chick limb bud chondrocytes in culture with benzamide: NAKANISHI & UYEKI 163
- Rat**  
 embryo  
 kinetic behaviour of cranial neural cells during neurulation in rat: TUCKETT & MORRISS-KAY 111
- Regeneration**  
 and wound healing in the cockroach leg: TRUBY 177
- Reversal**  
 of axes in chick wing buds – behaviour of growing axons: STIRLING & SUMMERBELL 251
- Ribonucleic acid (RNA)**  
 rare hnRNAs  
 transcription in sea urchin embryos and coelomocytes: KLEENE & HUMPHREYS 131  
 rare maternal RNAs  
 transcription in sea urchin embryos and coelomocytes: KLEENE & HUMPHREYS 131
- RNA:DNA hybridization**  
 in sea urchin derivatives: KLEENE & HUMPHREYS 131
- Robertsonian chromosome**  
 effects on seminiferous epithelium of the mouse: REDI, GARAGNA, HILSCHER & WINKING 1

**Scanning electron microscopy (SEM)**

of cell surface changes during cleavage of  
newt eggs: OHSHIMA & KUBOTA 21

**Sea urchin**

blastulae  
transcription rare hnRNAs and maternal  
RNAs: KLEENE & HUMPHREYS 131

**Seminiferous epithelium**

effects of some Robertsonian chromosome  
combinations in mouse: REDI, GARAGNA,  
HILSCHER & WINKING 1

**Sensory neurons**

transplanted in locust – projections and  
connections: ANDERSON 207

**Sertoli cells**

effects of some Robertsonian chromosome  
combinations in mouse: REDI, GARAGNA,  
HILSCHER & WINKING 1

**Somites**

chick  
protein synthetic patterns: LOVELL-BADGE,  
EVANS & BELLAIRS 65

**Spermatogenesis**

effects of some Robertsonian chromosome  
combinations in mouse: REDI, GARAGNA,  
HILSCHER & WINKING 1

**Spermatocyte**

effects of some Robertsonian chromosome  
combinations in mouse: REDI, GARAGNA,  
HILSCHER & WINKING 1

**Stomach**

human  
synthesis of apolipoproteins and other  
proteins: SHI, HOPKINS, THOMPSON,  
HEATH, LUKE & GRAHAM 191

**Testosterone**

growth stimulation of immature chick  
oviduct: GRAU, REICHHART & THIEBOLD 81

**Transcription**

of rare hnRNAs and maternal RNAs in sea  
urchins: KLEENE & HUMPHREYS 131

**Transferrin**

synthesis in human foetal yolk sack and  
organs: SHI, HOPKINS, THOMPSON, HEATH,  
LUKE & GRAHAM 191

**Translocation**

of eye in *Xenopus* – fibre pathways in optic  
tract: TAYLOR, WILLSHAW & GAZE 225

**Transplantation**

of locust sensory neurons – projections and  
connections: ANDERSON 207

**Triturus (see *Cynopus*)****Trophoblast**

human

synthesis of apolipoproteins and other  
proteins: SHI, HOPKINS, THOMPSON,  
HEATH, LUKE & GRAHAM 191

**Two-dimensional electrophoresis**

protein synthetic patterns of tissues of  
early chick embryos: LOVELL-BADGE, EVANS  
& BELLAIRS 65

**Vagina**

as target for growth stimulation in chick by  
androgens: GRAU, REICHHART &  
THIEBOLD 81

**Vascular regression**

during formation of free digits in avian  
limb bud: HURLE, COLVEE & FERNANDEZ-  
TERAN 239

**Visual projections**

from translocated eyes in *Xenopus*: TAYLOR,  
WILLSHAW & GAZE 225

**Wing bud**

chick  
with dorsoventral or anteroposterior axis  
reversed – axon behaviour: STIRLING &  
SUMMERBELL 251

**Wingless (ws)**

mutant in chick – role of ZPA in  
development of wing buds: WILSON &  
HINCHLIFFE 271

**Wound healing**

and regeneration in cockroach leg:  
TRUBY 177  
pattern regulation in fragments of  
*Drosophila* wing discs: DALE &  
BOWNES 95

***Xenopus laevis***

embryo  
synchronous cleavage and cytoplasmic  
cycle: SHINAGAWA 33  
visual system  
fibre pathways after contralateral eye  
translocation: TAYLOR, WILLSHAW &  
GAZE 225

**Yolk sack**

human  
synthesis of apolipoproteins and other  
proteins: SHI, HOPKINS, THOMPSON,  
HEATH, LUKE & GRAHAM 191

**Yolk synthesis**

in polychaete *Ophryotrocha*: EMANUELSSON &  
ANEHUS 151

**ZPA**

role in development of wing buds of  
wingless mutant chick embryos: WILSON &  
HINCHLIFFE 271
